# Supplementary material for: Cyanine-5-Driven Behaviours of Hyperbranched Polymers Designed for Therapeutic Delivery Are Cell-Type Specific and Correlated with Polar Lipid Distribution in Membranes
Source: MDPI journal article supplement (doi:10.3390/nano11071745), 2021-07-02
Supplement: s1 [file s1]

## Supplementary Materials

# Cyanine-5 Driven Behaviours of Hyperbranched Polymers Designed for Therapeutic Delivery are Cell-Type Specific and Correlated with Polar Lipid Distribution in Membranes

Joshua D. Simpson <sup>1,2,3</sup>, Denni L. Currin-Ross <sup>3</sup>, Gayathri R. Ediriweera <sup>1,2,3</sup>, Horst Joachim Schirra <sup>3,4,5</sup>, Nicholas L. Fletcher <sup>1,2,3</sup>, Craig A. Bell <sup>1,2,3</sup>, Maria C. Arno <sup>6,7</sup>, and Kristofer J. Thurecht <sup>1,2,3,\*</sup>

<sup>1</sup> Australian Institute for Bioengineering & Nanotechnology, University of Queensland, St. Lucia, QLD 4072, Australia; j.simpson@uq.edu.au (J.D.S.); a.ediriweera@uq.edu.au (G.R.E.); n.fletcher1@uq.edu.au (N.L.F.); c.bell1@uq.edu.au (C.A.B.)

<sup>2</sup> ARC Centre of Excellence in Convergent Bio-Nano Science & Technology, ARC Training Centre for Innovation in Biomedical Imaging Technology, University of Queensland, St. Lucia, QLD 4072, Australia;

<sup>3</sup> Centre for Advanced Imaging, University of Queensland, St. Lucia, QLD 4072, Australia; d.denni@uq.edu.au (D.L.C.-R.); h.schirra@uq.edu.au (H.J.S.)

<sup>4</sup> School of Environment and Science, Griffith University, Nathan, Qld 4111, Australia.

<sup>5</sup> Griffith Institute for Drug Discovery, Griffith University, Nathan, Qld 4111, Australia

<sup>6</sup> School of Chemistry, University of Birmingham, Edgbaston, Birmingham B15 2TT, UK; m.c.arno@bham.ac.uk

<sup>7</sup> Institute of Cancer and Genomic Sciences, University of Birmingham, Edgbaston, Birmingham B15 2TT, UK

\* Correspondence: k.thurecht@uq.edu.au

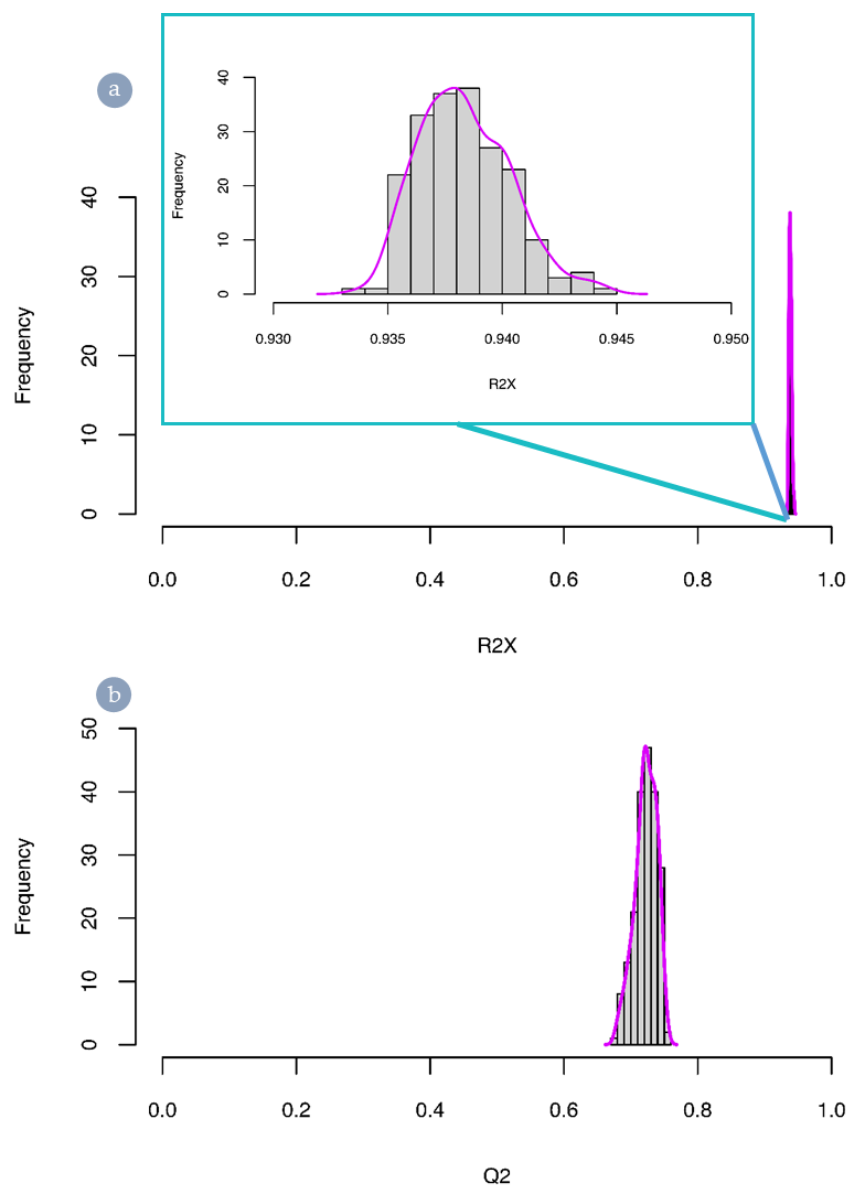

**Figure S1:** PCA model validation, **(a)** Histogram of  $R^2$  information, showing good fit quality of all permuted models, **(inset)** zoomed-in histogram for clarity, **(b)** histogram depicting  $Q^2$  information.

**Table S1:** Figures of merit for PCA model analysis.

| Number | Model | Type  | A | N   | Models           |                       |                | Model Content                 |
|--------|-------|-------|---|-----|------------------|-----------------------|----------------|-------------------------------|
|        |       |       |   |     | R <sup>2</sup> X | R <sup>2</sup> Y(cum) | Q <sup>2</sup> |                               |
| 1      | M1    | PCA-X | 3 | 360 | 0.974            | N/A                   | 0.906          | All Data                      |
| 2      | M2    | PCA-X | 3 | 150 | 0.985            | N/A                   | 0.939          | Internals Only (U251 Removed) |
| 3      | M3    | PCA-X | 3 | 150 | 0.978            | N/A                   | 0.935          | Externals Only (U251 Removed) |

A = number of principal components; N = number of samples in the model; R<sup>2</sup>X = fraction of the variance of the X variables explained by the model; Q<sup>2</sup> = predictive ability parameter of the model.

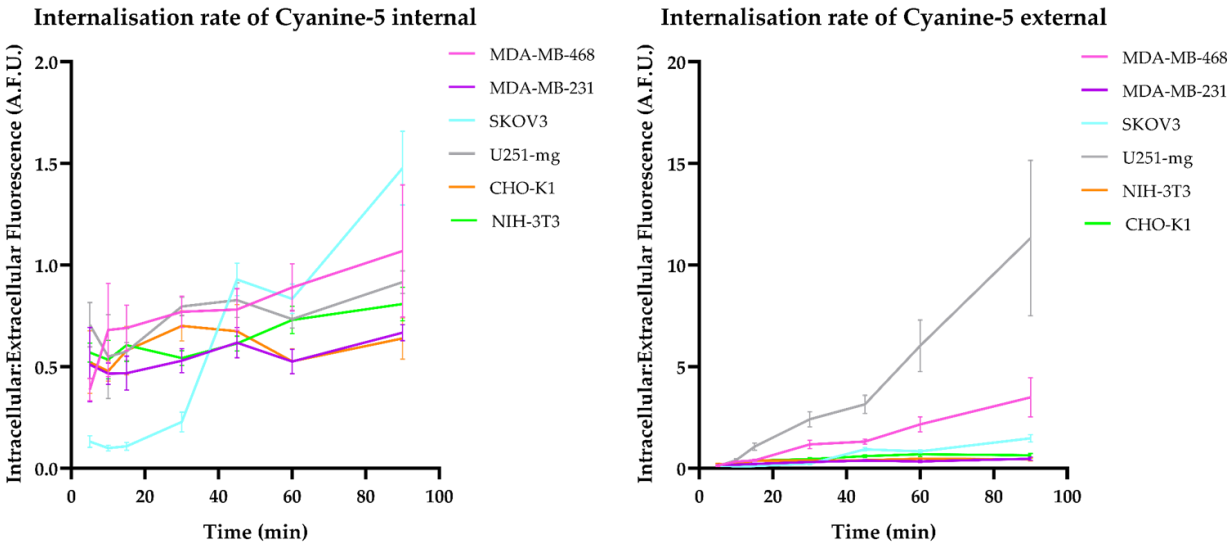

**Figure S2:** ROI kinetic rate data plotted by HBP analogue, **(a)** Cy5 internal, and **(b)** Cy5 external.

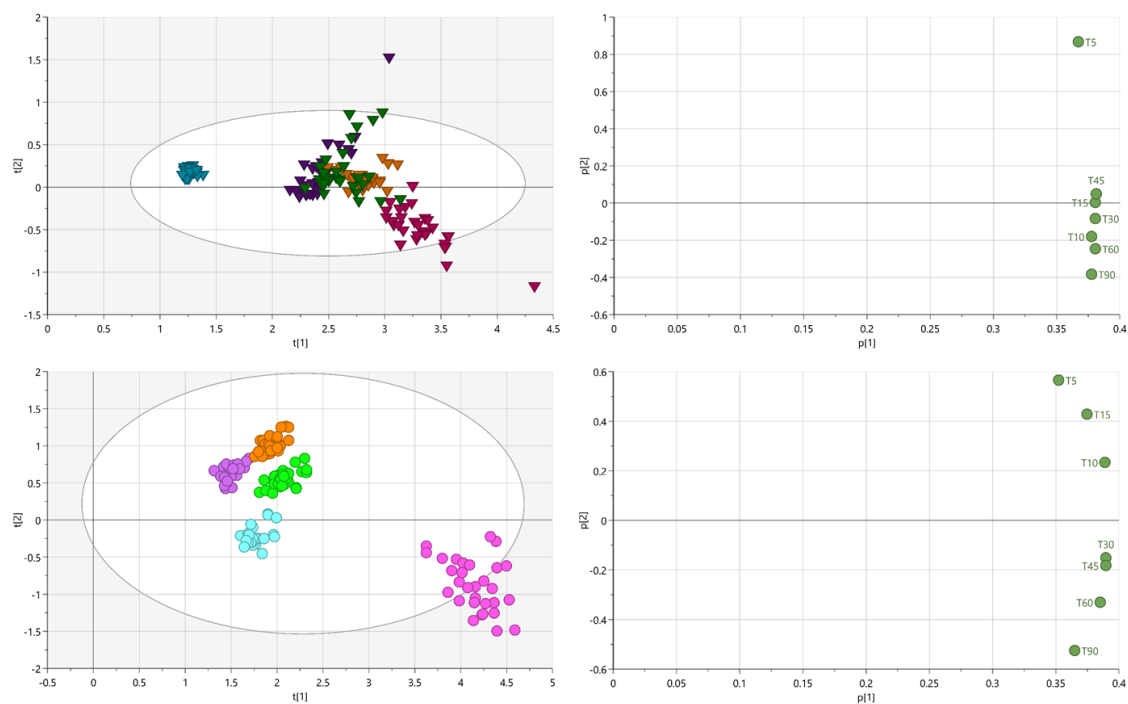

**Figure S3:** PCA results of U251-mg excluded data, showing separation along  $t[1]$  and  $t[2]$ .

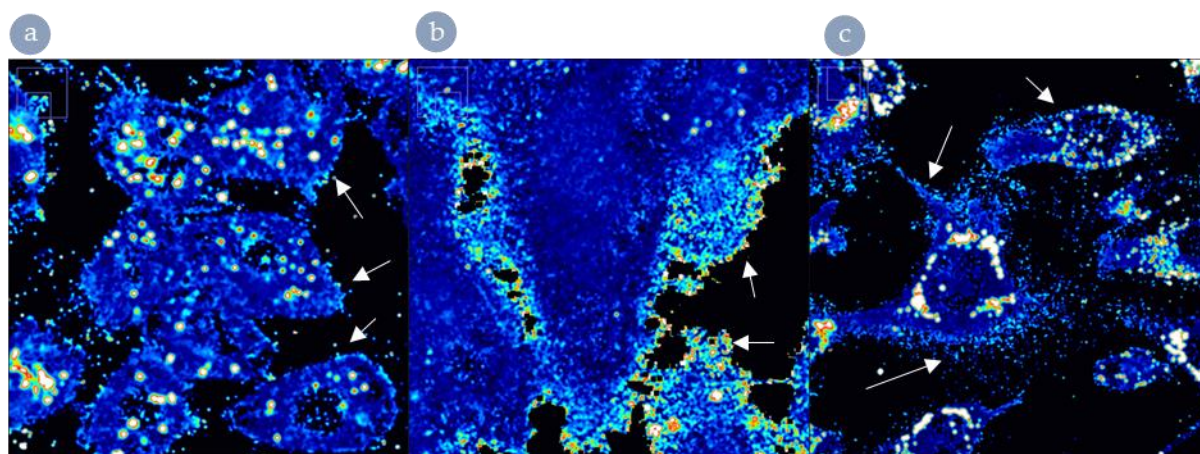

**Figure S4:** Polar lipid-rich membrane microdomains identified through ratiometric images, (a) zoomed-in image of an MDA-MB-468 cell membrane (b) zoomed-in image of a U251-mg cell membrane, (c) zoomed-in image of an SK-OV-3 cell membrane.
